# Supplementary material
Source: Springer Nature journal article supplement (https://www.springermedizin.de/resource/supplementary/13075_2010_2820_MOESM4_ESM.pdf/9692960)

**A**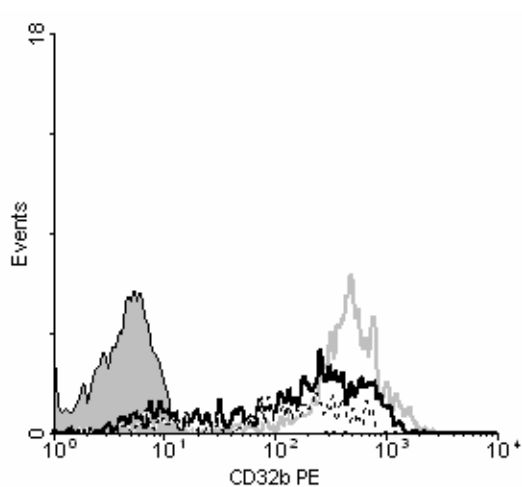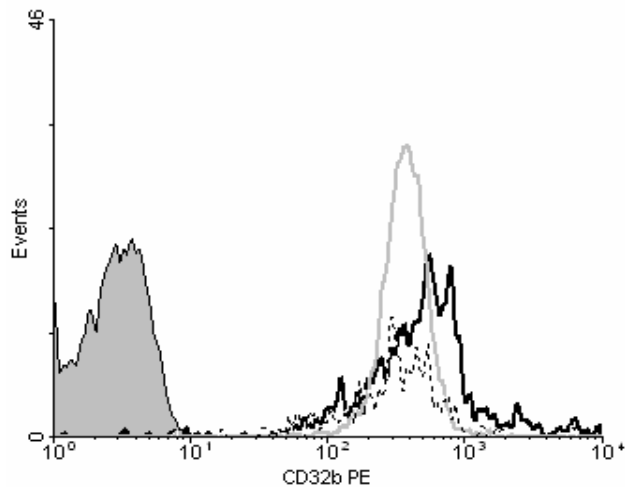**B**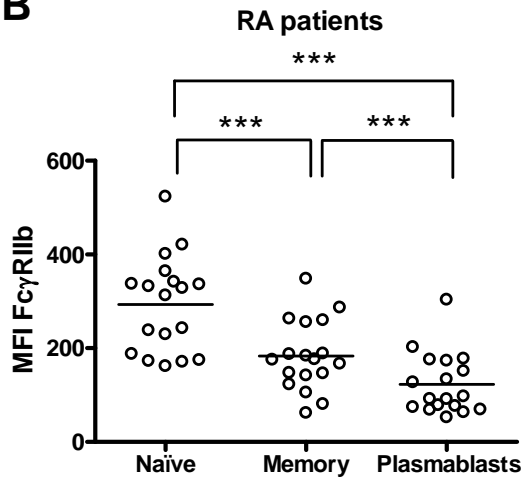**C**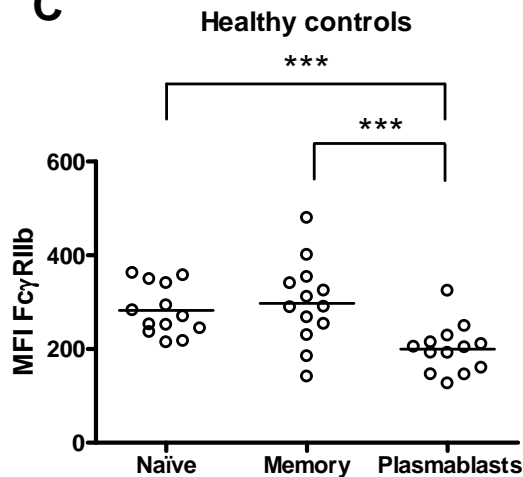

Supplement: MOESM4 [file 9692960]
